# Supplementary material for: Rational design of a g-C3N4/Bi2S3/ZnS ternary heterojunction photoanode for improved solar water splitting
Source: Royal Society of Chemistry journal article supplement (doi:10.1039/d4se00147h), 2024-01-01
Supplement: d4se00147h1.pdf [file d4se00147h1.pdf]

## Supporting Information

### *Synthesis of graphitic carbon nitride (g-C<sub>3</sub>N<sub>4</sub>)*

Urea and thiourea were used as precursors for the synthesis g-C<sub>3</sub>N<sub>4</sub> via solid-state thermal polymerization process. A 1:1 mixture of urea and thiourea was thoroughly mixed in a covered silica crucible and heated at 550° C for one hour in a muffle furnace. Pale yellow graphitic carbon nitride samples were collected and milled into fine powder after cooling to room temperature [24].

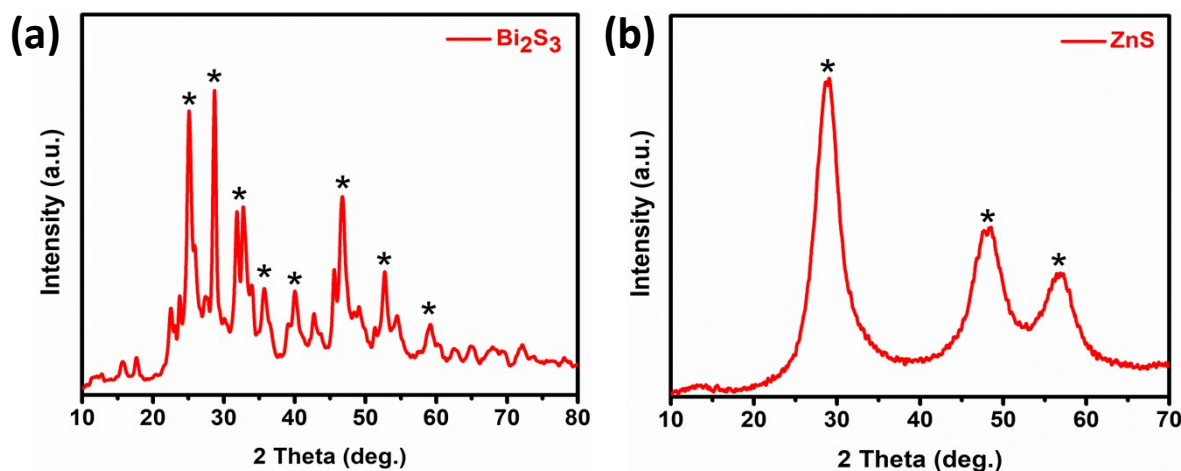

Fig S1. XRD diffraction pattern of Bi<sub>2</sub>S<sub>3</sub> and ZnS

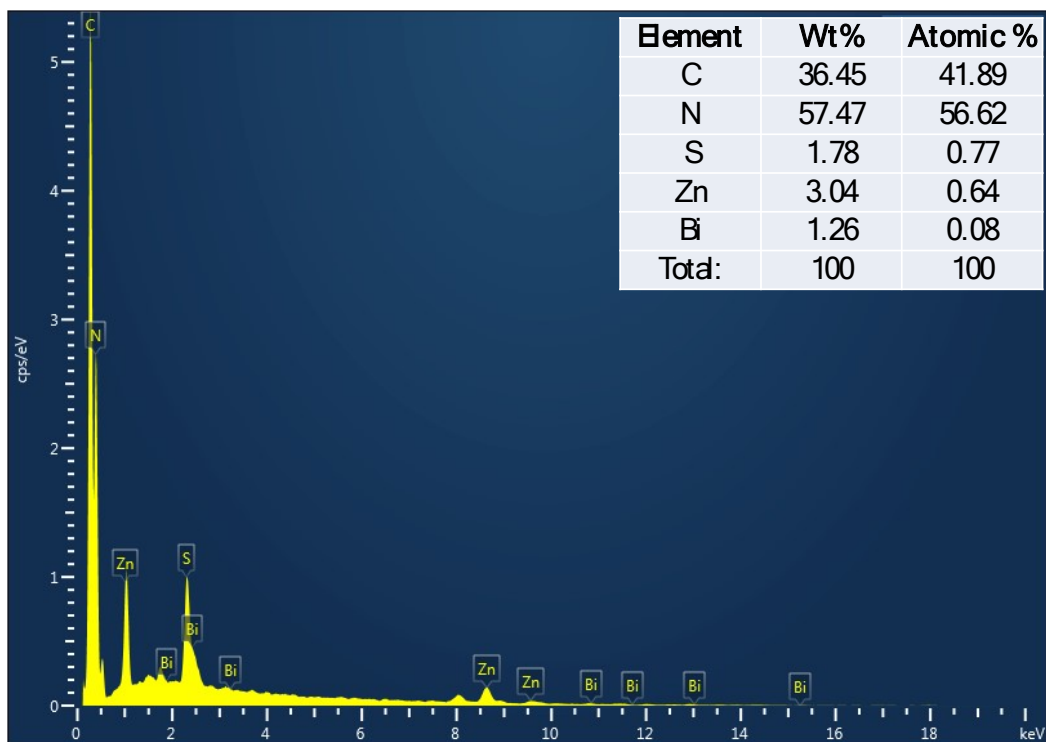

Fig S2. EDS spectra of g-C<sub>3</sub>N<sub>4</sub>/Bi<sub>2</sub>S<sub>3</sub>/ZnS composite

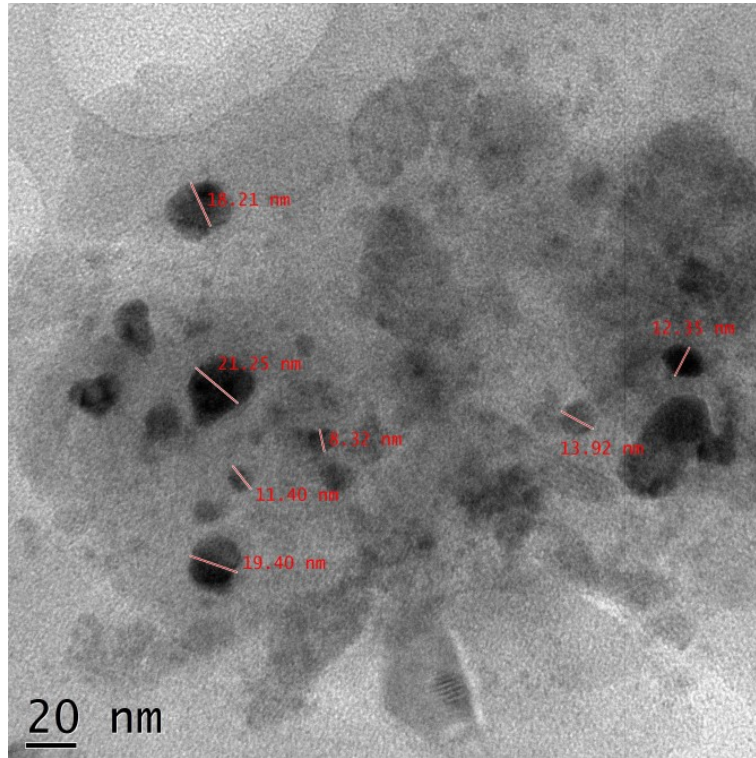

**Fig S3.** TEM image of g-C<sub>3</sub>N<sub>4</sub>/Bi<sub>2</sub>S<sub>3</sub>/ZnS

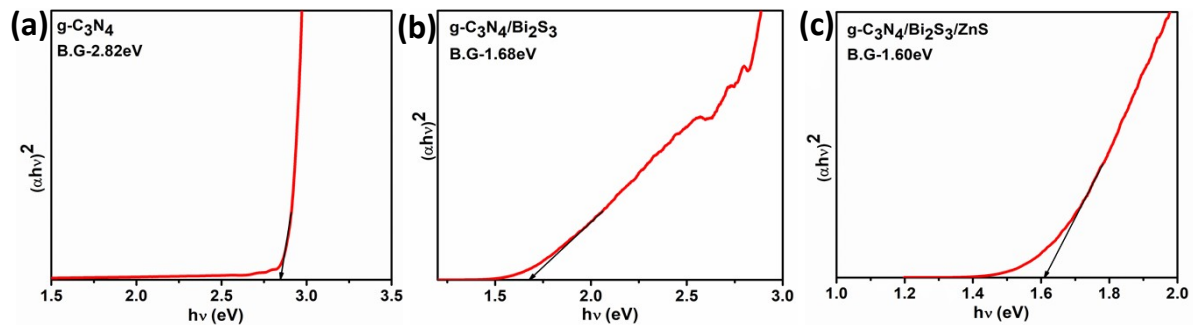

**Fig. S4.** Tauc plot of (a) g-C<sub>3</sub>N<sub>4</sub> (b) g-C<sub>3</sub>N<sub>4</sub>/Bi<sub>2</sub>S<sub>3</sub> and (c) g-C<sub>3</sub>N<sub>4</sub>/Bi<sub>2</sub>S<sub>3</sub>/ZnS

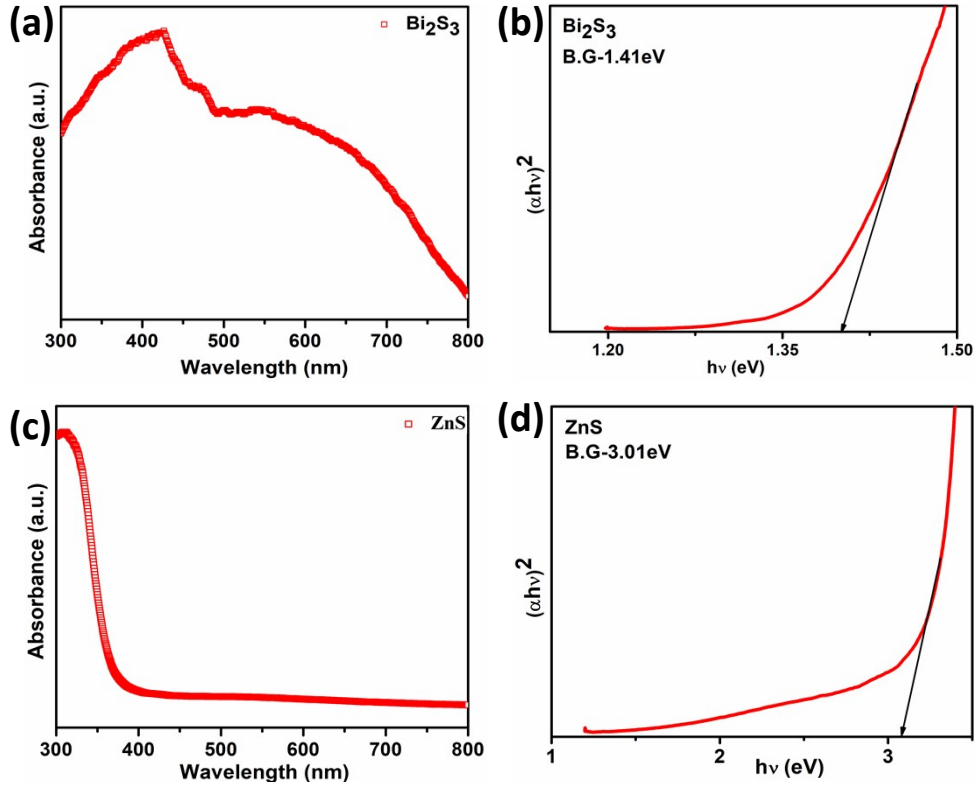

**Fig. S5:** (a) UV-DRS plot of  $\text{Bi}_2\text{S}_3$  (b) Tauc plot of  $\text{Bi}_2\text{S}_3$  (c) UV-DRS plot of  $\text{ZnS}$  (d) Tauc plot of  $\text{ZnS}$

Using the Nernst equation, the measured applied potential vs  $\text{Ag}/\text{AgCl}$  was transformed into a reversible hydrogen electrode (RHE):

$$E_{\text{RHE}} = E_{\text{Ag}/\text{AgCl}} + E^{\circ}_{\text{Ag}/\text{AgCl}} + 0.059 \text{ pH} \quad (1)$$

$E^{\circ}_{\text{Ag}/\text{AgCl}}$  - standard electrode potential of  $\text{Ag}/\text{AgCl}$  (0.197 V)

The following equation was used to determine the photoelectrodes' solar to hydrogen conversion efficiency ( $\eta$ ) for the PEC hydrogen evolution reaction:

$$\eta = J (1.23 - V) / P_{\text{light}} \quad (2)$$

where,  $P_{\text{light}}$ ,  $J$  and  $V$  are the illumination intensity ( $100 \text{ mW cm}^{-2}$ ), photocurrent density at the measured bias and applied potential versus RHE, respectively.

**Table S1:** Comparison with previously reported literature

| System                                                                 | Photocurrent Density (mA.cm <sup>2</sup> ) | Potential             | Electrolyte                            | Ref       |
|------------------------------------------------------------------------|--------------------------------------------|-----------------------|----------------------------------------|-----------|
| Ag/g-C <sub>3</sub> N <sub>4</sub> (1 : 10)                            | 0.00640                                    | V <sub>SCE</sub>      | 0.05 M Na <sub>2</sub> SO <sub>4</sub> | 1         |
| WO <sub>3</sub> / g-C <sub>3</sub> N <sub>4</sub>                      | 0.82                                       | 1.23 V <sub>RHE</sub> | 0.5 M Na <sub>2</sub> SO <sub>4</sub>  | 2         |
| g-C <sub>3</sub> N <sub>4</sub> -S/BiOI                                | 0.70                                       | V <sub>Ag/AgCl</sub>  | 0.1 M Na <sub>2</sub> SO <sub>4</sub>  | 3         |
| 0.5 g-C <sub>3</sub> N <sub>4</sub> /Ti-Fe <sub>2</sub> O <sub>3</sub> | 2.55                                       | V <sub>Ag/AgCl</sub>  | 1 M NaOH                               | 4         |
| g-C <sub>3</sub> N <sub>4</sub> /BiVO <sub>4</sub>                     | 0.42                                       | V <sub>RHE</sub>      | 0.5 M Na <sub>2</sub> SO <sub>4</sub>  | 5         |
| TiO <sub>2</sub> @Co-C <sub>3</sub> N <sub>4</sub>                     | 1.79                                       | 1.23 V <sub>RHE</sub> | 0.1 M Na <sub>2</sub> SO <sub>4</sub>  | 6         |
| Pd@g-C <sub>3</sub> N <sub>4</sub>                                     | 0.0788                                     | 1.23 V <sub>RHE</sub> | 0.1 M Na <sub>2</sub> SO <sub>4</sub>  | 7         |
| g-C <sub>3</sub> N <sub>4</sub> /Bi <sub>2</sub> S <sub>3</sub> /ZnS   | 0.99                                       | 1.23 V <sub>RHE</sub> | 0.1 M Na <sub>2</sub> SO <sub>4</sub>  | This work |

**Table S2:** Parameters of Nyquist Plots

| Sample                                                               | R <sub>s</sub> (Ω) | R <sub>CT</sub> (kΩ) | CPE (μΩ <sup>-1</sup> ) |
|----------------------------------------------------------------------|--------------------|----------------------|-------------------------|
| g-C <sub>3</sub> N <sub>4</sub>                                      | 93.1               | 187                  | 0.998                   |
| g-C <sub>3</sub> N <sub>4</sub> /Bi <sub>2</sub> S <sub>3</sub>      | 71.8               | 52.6                 | 0.999                   |
| g-C <sub>3</sub> N <sub>4</sub> /Bi <sub>2</sub> S <sub>3</sub> /ZnS | 48.6               | 50                   | 0.998                   |

In order to quantify the Faradaic efficiency, the volume of gas collected per area of electrode was recorded every 30 min.

$$\text{Faradaic Efficiency (\%)} = \frac{n H_2 (Exp)}{n H_2 (Act)} \times 100 \quad (1)$$

$$n H_2 (Th) = \frac{Q}{2 F}$$

$$Q = I \times t$$

$$I = J \times A$$

where  $n H_2$  is the amount of hydrogen generated,  $Q$  is the total amount of charge passed through the cell (C),  $F$  is the Faraday constant ( $96485 \text{ C mol}^{-1}$ ),  $J$  is the photocurrent density ( $\text{A m}^{-2}$ ),  $I$  is the photocurrent (A),  $t$  is the time (s) and  $A$  is the area of the electrode ( $\text{m}^2$ ) [8].

The number of moles of hydrogen directly measured from photocurrent density (I-t curve)  $n H_{2 (Exp)}$  and the number of moles of hydrogen calculated from the GC responses  $n H_{2 (Act)}$  and the Faradaic efficiencies are depicted in **Table S3** and **Table S4**.

**Table S3: Faradaic efficiencies of the g-C<sub>3</sub>N<sub>4</sub>/Bi<sub>2</sub>S<sub>3</sub>**

| Time (min) | $n H_{2 (Exp)}$ (mol)  | $n H_{2 (Act)}$ (mol)  | Faradaic Efficiency (%) |
|------------|------------------------|------------------------|-------------------------|
| 30         | $0.042 \times 10^{-3}$ | $6.915 \times 10^{-5}$ | 61.5                    |
| 60         | $0.035 \times 10^{-3}$ | $5.652 \times 10^{-5}$ | 62.3                    |

**Table S4: Faradaic efficiencies of the g-C<sub>3</sub>N<sub>4</sub>/Bi<sub>2</sub>S<sub>3</sub>/ZnS**

| Time (min) | $n H_{2 (Exp)}$ (mol)  | $n H_{2 (Act)}$ (mol)  | Faradaic Efficiency (%) |
|------------|------------------------|------------------------|-------------------------|
| 30         | $0.118 \times 10^{-3}$ | $1.257 \times 10^{-4}$ | 94.2                    |
| 60         | $0.119 \times 10^{-3}$ | $1.257 \times 10^{-4}$ | 95.0                    |

#### Cyclic voltammograms (CV):

Figure S1 depicts the CV of g-C<sub>3</sub>N<sub>4</sub>, Bi<sub>2</sub>S<sub>3</sub> and ZnS. Pt and Ag/AgCl/KCl served as the counter electrode and reference electrode, respectively, g-C<sub>3</sub>N<sub>4</sub>, Bi<sub>2</sub>S<sub>3</sub> and ZnS films (as working electrodes) were recorded in an aqueous KCl solution.

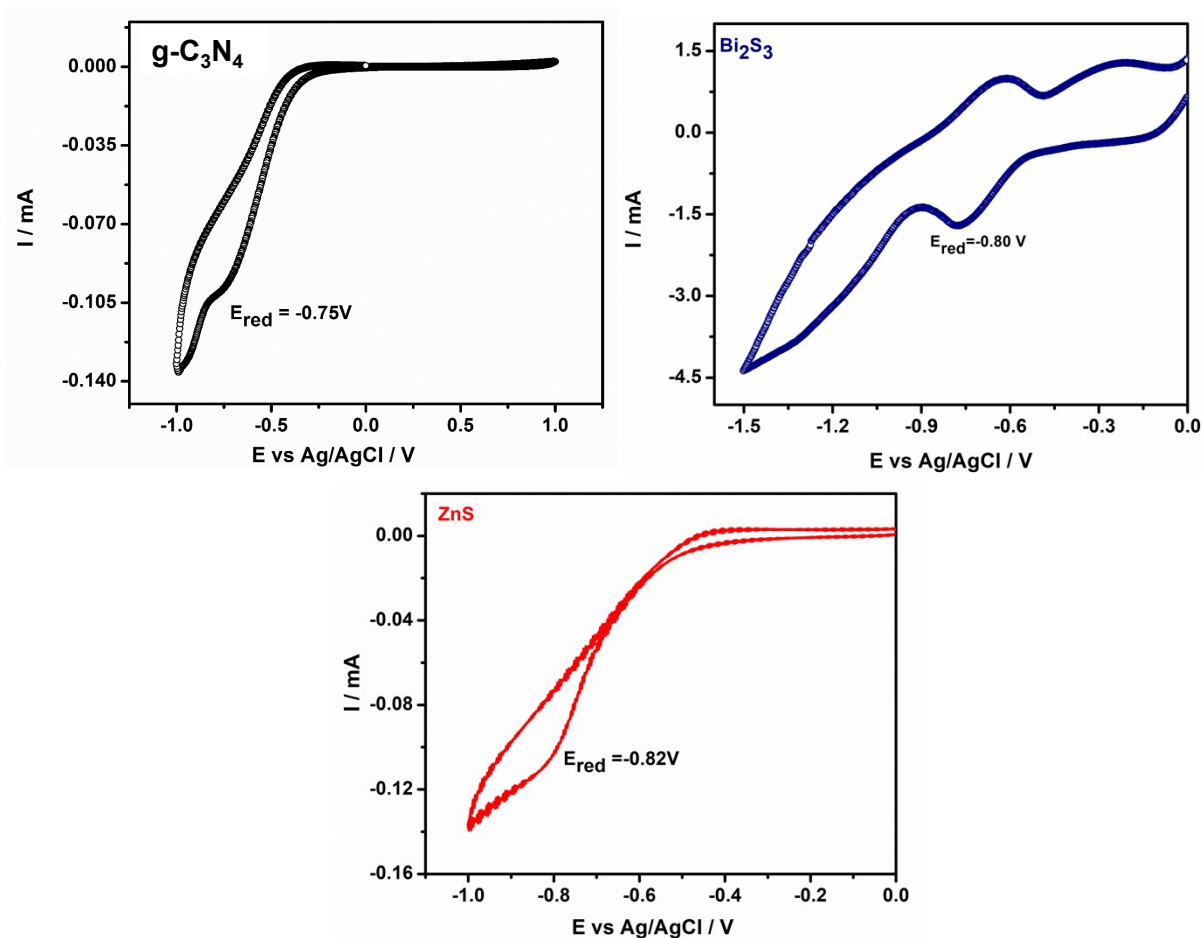

**Fig S6.** CV plots of g-C<sub>3</sub>N<sub>4</sub>, Bi<sub>2</sub>S<sub>3</sub> and ZnS

The following approach was used to compute the locations of the valence band (VB) and conduction band (CB) for g-C<sub>3</sub>N<sub>4</sub>

$$E_{\text{red}} = -0.75 \text{ V versus Ag/AgCl/KCl}$$

$$\text{Electrode potential of reference electrode} = +0.197 \text{ V}$$

$$E_{\text{red}} \text{ versus NHE (normal hydrogen electrode)}$$

$$E_{\text{red}} = -0.75 \text{ V} + 0.197 \text{ V} = -0.55 \text{ V (NHE)}$$

We converted V (volts) into eV (electron volts),

$$\text{Therefore } E_{\text{red}} = -4.5 \text{ eV (0 V vs NHE)} - (-0.55 \text{ V}) = -3.95 \text{ eV (CB)}$$

The optical bandgap energy value was then added to the CB energy to determine the VB location of g-C<sub>3</sub>N<sub>4</sub>.

$$E_{\text{red}} = -3.95 \text{ eV} + (-2.82 \text{ eV}) = -6.77 \text{ eV (VB)}$$

For Bi<sub>2</sub>S<sub>3</sub>:

$$E_{\text{red}} = -0.80 \text{ V} + 0.197 \text{ V} = -0.60 \text{ V (NHE)}$$

$$E_{\text{red}} = -4.5 \text{ eV (0 V vs NHE)} - (-0.60 \text{ V}) = -3.90 \text{ eV (CB)}$$

$$E_{\text{red}} = -3.90 \text{ eV} + (-1.41 \text{ eV}) = -5.31 \text{ eV (VB)}$$

For ZnS:

$$E_{\text{red}} = -0.82 \text{ V} + 0.197 \text{ V} = -0.62 \text{ V (NHE)}$$

$$E_{\text{red}} = -4.5 \text{ eV (0 V vs NHE)} - (-0.62 \text{ V}) = -3.88 \text{ eV (CB)}$$

$$E_{\text{red}} = -3.88 \text{ eV} + (-3.07 \text{ eV}) = -6.95 \text{ eV (VB)}$$

## References

1. F. Qi, Y. Li, Y. Wang, Y. Wang, S. Liu and X. Zhao, *RSC Adv.*, 2016, **6**, 81378–81385.
2. C.-H. Wang, D.-D. Qin, D.-L. Shan, J. Gu, Y. Yan, J. Chen, Q.-H. Wang, C.-H. He, Y. Li, J.-J. Quan and X.-Q. Lu, *Phys. Chem. Chem. Phys.*, 2017, **19**, 4507–4515.
3. K. M. Alam, P. Kumar, P. Kar, U. K. Thakur, S. Zeng, K. Cui and K. Shankar, *Nanoscale Adv.*, 2019, **1**, 1460–1471.
4. Y. Liu, F.-Y. Su, Y.-X. Yu and W.-D. Zhang, *International Journal of Hydrogen Energy*, 2016, **41**, 7270–7279.
5. Y. Li, M. Yang, Z. Tian, N. Luo, Y. Li, H. Zhang, A. Zhou and S. Xiong, *Front. Chem.*, 2019, **7**, 334.
6. J. Safaei, H. Ullah, N. A. Mohamed, M. F. Mohamad Noh, M. F. Soh, A. A. Tahir, N. Ahmad Ludin, M. A. Ibrahim, W. N. R. Wan Isahak and M. A. Mat Teridi, *Applied Catalysis B: Environmental*, 2018, **234**, 296–310.
7. M. Karimi-Nazarabad, E. K. Goharshadi and S. J. Mahdizadeh, *J. Phys. Chem. C*, 2019, **123**, 26106–26115.
8. H. Qi, J. Wolfe, D. Fichou and Z. Chen, *Sci Rep*, 2016, **6**, 30882.
